# Supplementary material
Source: Research Square preprint supplement (doi:10.21203/rs.3.rs-9695636/v1)
Supplement: Supplementary file 1 [file ffb401c1dbea29fc69c2eeda.docx]

**Appendix A1**

Variable descriptions

| Variable | Descriptions |
| --- | --- |
| LN(S) | The logarithm of total sales |
| (LN(S))2 | The square of LN(S) |
| K/S | The ratio of net fixed asset to total sales |
| (K/S)2 | The square of K/S |
| Y/S | The ratio of operating income to total sales |
| (R&D)/K | The ratio of research and development expenditures to net fixed asset |
| A/K | The ratio of advertising expenditures to net fixed asset |
| I/K | The ratio of capital expenditures to net fixed asset |
| SIGMA | The standard deviation of idiosyncratic stock-price risk, calculated as the standard deviation of the residuals from the CAPM model estimated using daily stock returns over the fiscal year. |
| Listage | The number of years since a firm’s first appearance in the CSMAR database |
| Amihud | For each stock i in year y, the illiquidity measure is calculated as ,where is the number of days for which data are available for stock i in year y, is the return on the reinvestment of cash dividends of stock i on day t, is the volume for stock i on day t |
| FHT | For each stock i in year y, the illiquidity measure is calculated as ,where is the return volatility, is the inverse function of the cumulative normal distribution,and z is the empirically observed frequency of a zero return day.The empirically observed frequency of a zero return is computed as ，where ZRD is the number of zero-return days and TD is the total number of trading days in a given stock-year |
| Leverage | The sum of book value of current and long-term debts scaled by the book value of total assets. |
| Inverse price | One divided by the year-end stock price |
| Size | The natural logarithm of total book value of assets |
| HS300 indicator | A dummy variable equal to one if the firm is the HS300 index as of the year end, and zero otherwise |
| D&O ownership | The percentage of the company's outstanding shares held by directors and officers. |
| Ownership 0% to 5% | =D&O ownership if D&O ownership < 0.05,  and= 0.05 if D&O ownership ≥ 0.05. |
| Ownership 5% to 25% | = 0 if D&O ownership <0.05  =D&O ownership minus 0.05 if 0.05 ≤ D&O ownership*<* 0.25,  = 0.20 if D&O ownership≥ 0.25. |

Table A.1(*continued*)

| Variable | Descriptions |
| --- | --- |
| Ownership over 25% | =0 if D&O ownership*<* 0.25,  = D&O ownership minus 0.25 if D&O ownership≥ 0.25 |
| Ownership wedge | The difference between the first ownership observation for a firm in our sample and the managerial ownership lagged by one period. |
| IPO wedge | The difference between the managerial ownership observation reported in the year of an IPO and the managerial ownership lagged by one period. |
| ROA | Return on total assets computed as earnings before interest and taxes (EBIT) scaled by the book value of total assets |
| Sales growth | The percentage change in total sales, calculated as (salet− salet-1)/salet-1; |
| Stock return | The annual stock return calculated using monthly stock return |
| Systematic risk | Rolling five-year window estimates of betas using monthly stock returns and the value-weighted market returns |
| Tobin Q | The firm’s market value divided by its total assets as of the end of the fiscal year |
| Total Q | The ratio of firm value to the sum of physical and intangible capital.A detailed description of the total Q can be found in Peters and Taylor(2017) |
| Volatility of the monthly stock | The standard deviation of stock returns using monthly data on stock returns from CSMAR over the previous 48 months |
| Normalized high(low) liquidity years [Amihud] | The ratio of the accumulated high (low) liquidity years since 1990 to the number of years in the CSMAR universe. A given firm-year observation is categorized as “high (low) liquidity” if the value of its Amihud measure is in the bottom (top) quartile of the respective illiquidity measure relative to the entire CSMAR universe of firms each year. |
| Normalized high(low) liquidity years [FHT] | The ratio of the accumulated high (low) liquidity years since 1990 to the number of years in the CSMAR universe. A given firm-year observation is categorized as “high (low) liquidity” if the value of its FHT measure is in the bottom (top) quartile of the respective illiquidity measure relative to the entire CSMAR universe of firms each year. |
| Normalized high(low) performance years [ROA] | The ratio of the accumulated high (low) performance years since 1990 to the number of years in the CSMAR universe. A given firm-year observation is categorized as “high (low) performance” if its ROA is in the top (bottom) quartile relative to the entire CSMAR universe of firms each year. |
| Normalized high(low) performance years [Sales growth] | The ratio of the accumulated high (low) performance years since 1990 to the number of years in the CSMAR universe. A given firm-year observation is categorized as “high (low) performance” if its sales growth is in the top (bottom) quartile relative to the entire CSMAR universe of firms each year. |
| SOE | An indicator variable equal to one if the firm is state-owned enterprise,and zero otherwise |
| Tech | A dummy variable equal to one if the firm belongs to technology company,and zero otherwise.According to the Guidelines on Industry Classification of Listed Companies issued by the China Securities Regulatory Commission in 2012, we identified companies with industry level 1 codes of "I" and "M" as technology companies. |
